# Supplementary material for: Assessment of Retrospective COVID-19 Spatial Clusters with Respect to Demographic Factors: Case Study of Kansas City, Missouri, United States
Source: MDPI journal article supplement (doi:10.3390/ijerph182111496), 2021-11-01
Supplement: s1 [file s1]

## Supplementary Document

**Table S1.** Populations of Platte County, Clay County, and Jackson County in Kansas City, Missouri. These populations were collected based on zip code.

| County     | Platte | Clay    | Jackson | total   |
|------------|--------|---------|---------|---------|
| Population | 70,574 | 155,551 | 304,558 | 530,683 |

**Table S2.** Population of Platte County, Missouri based on the zip codes.

| zip code | population |
|----------|------------|
| 64151    | 26,128     |
| 64152    | 28,307     |
| 64153    | 5,383      |
| 64154    | 10,497     |
| 64164    | 259        |

**Table S3.** Population of Clay County, Missouri based on the zip codes.

| zip code | population |
|----------|------------|
| 64116    | 15,372     |
| 64117    | 15,001     |
| 64118    | 42,493     |
| 64119    | 26,830     |
| 64155    | 23,108     |
| 64156    | 7,372      |
| 64157    | 19,680     |
| 64158    | 4,796      |
| 64165    | 197        |
| 64166    | 225        |
| 64167    | 477        |

**Table S4.** Population of Jackson County, Missouri based on the zip codes.

| <b>zip code</b> | <b>Population</b> |
|-----------------|-------------------|
| 64101           | 279               |
| 64102           | 0                 |
| 64105           | 4,306             |
| 64106           | 9,360             |
| 64108           | 7,491             |
| 64109           | 9,188             |
| 64110           | 16,745            |
| 64111           | 17,398            |
| 64112           | 8,698             |
| 64113           | 12,120            |
| 64114           | 24,760            |
| 64120           | 297               |
| 64123           | 9,017             |
| 64124           | 10,534            |
| 64125           | 1,414             |
| 64126           | 6,488             |
| 64127           | 14,707            |
| 64128           | 12,056            |
| 64129           | 8,898             |
| 64130           | 20,215            |
| 64131           | 22,485            |
| 64132           | 14,474            |
| 64134           | 23,836            |
| 64136           | 2,211             |
| 64137           | 11,349            |
| 64138           | 26,485            |
| 64139           | 1,925             |
| 64145           | 5,288             |
| 64146           | 1,574             |
| 64147           | 640               |
| 64149           | 320               |
| 64192           | 0                 |

Populations for each zip code were collected from [www.bestplaces.net](http://www.bestplaces.net)

We used the following resources to find the population of each county based on the zip codes.

Population of Platte County: <https://www.bestplaces.net/find/zip.aspx?county=29165&st=MO>

Population of Clay County: <https://www.bestplaces.net/find/zip.aspx?county=29047&st=MO>

Population of Jackson County: <https://www.bestplaces.net/find/zip.aspx?county=29095&st=MO>

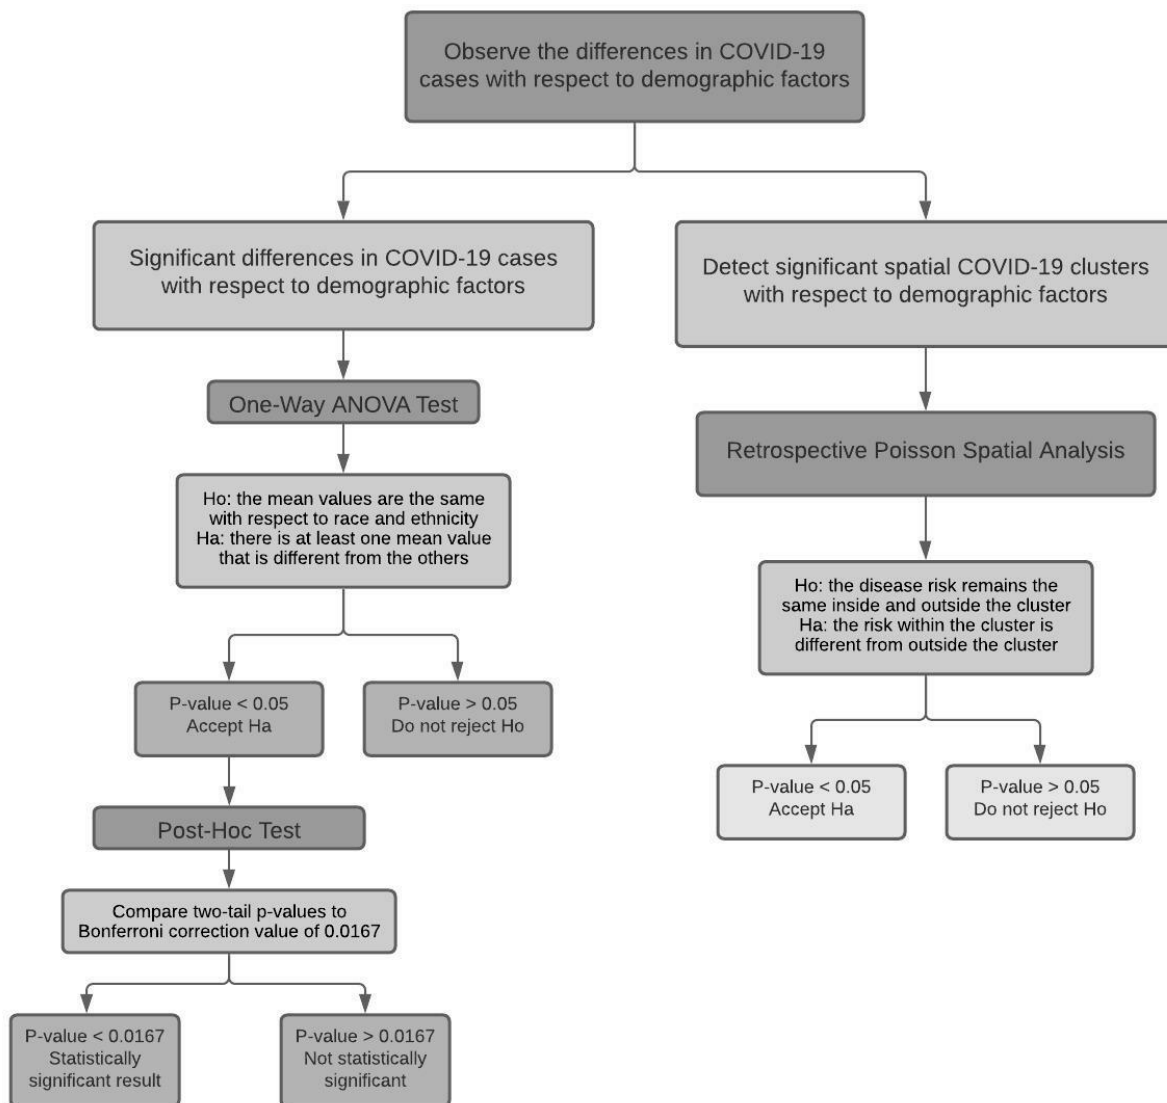

Figure S1: Describing the relations of the selected methods
